# Supplementary material
Source: publisher site journal article supplement (https://www.dovepress.com/article/364915)

| **Center** |
| --- |
| Guangdong Academy of Medical Sciences, Guangdong Provincial People’s Hospital, Guangzhou, China |
| Maoming People's Hospital, Maoming, China |
| Shenzhen People's Hospital, Shenzhen, China |
| Yangjiang People's Hospital, Yangjiang, China |
| Longyan First Affiliated Hospital of Fujian Medical University, Longyan, China |

**Supplemental Table 1. Five south Chinese regional central tertiary teaching hospitals**

**Supplemental Table 2. Association of SII with long-term all-cause mortality in multivariable Cox proportional hazard regression models.**

| Risk factors | HR (95%CI) | P value |
| --- | --- | --- |
| Q1(SII≤404.5) | 1.00(Ref） | - |
| Q2(404.5＜SII≤631.7) | 1.15(1.05,1.26) | <0.001 |
| Q3(631.7＜SII≤1082.8) | 1.31(1.19,1.43) | <0.001 |
| Q4(1082.8≤SII) | 1.59(1.45,1.75) | <0.001 |
| age | 1.03(1.02,1.03) | <0.001 |
| gender | 0.74(0.69,0.79) | <0.001 |
| CAD | 1.32(1.18,1.48) | <0.001 |
| HT | 0.96(0.89,1.03) | 0.210 |
| PCI | 0.74(0.68,0.81) | <0.001 |
| DM | 1.09(1.06,1.12) | <0.001 |
| eGFR | 0.99(0.99,0.99) | <0.001 |
| CHF | 1.55(1.43,1.67) | <0.001 |
| IABP | 1.25(1.04,1.5) | 0.022 |
| AMI | 0.97(0.89,1.05) | 0.441 |
| anemia | 1.25(1.17,1.34) | <0.001 |
| Cmv | 1.00(1.00,1.01) | <0.001 |
| LDL-C | 1.02(0.99,1.06) | 0.201 |
| statins | 0.93(0.84,1.03) | 0.181 |
| ACEI/ARB | 0.95(0.89,1.02) | 0.182 |
| β-blocker | 0.97(0.90,1.05) | 0.483 |
| CCB | 1.07(0.99,1.15) | 0.093 |

**Abbreviation:** AMI = acute myocardial infarction; CAD= coronary artery disease; HT=hypertension; DM= diabetes mellitus; CHF=congestive heart failure; IABP= intra-aortic ballon pump; PCI= percutaneous interventions; LDL-C=low density lipoprotein cholesterol; eGFR=estimated glomerular filtration rate; ACEI/ARB= angiotensin-converting enzyme inhibitor/angiotensin receptor blocker; CCB=calcium channel blocker; CMV= contrast media volume;

**Supplemental Figure. 1. Flow of patients through the study.** SII: systemic immune inflammation index


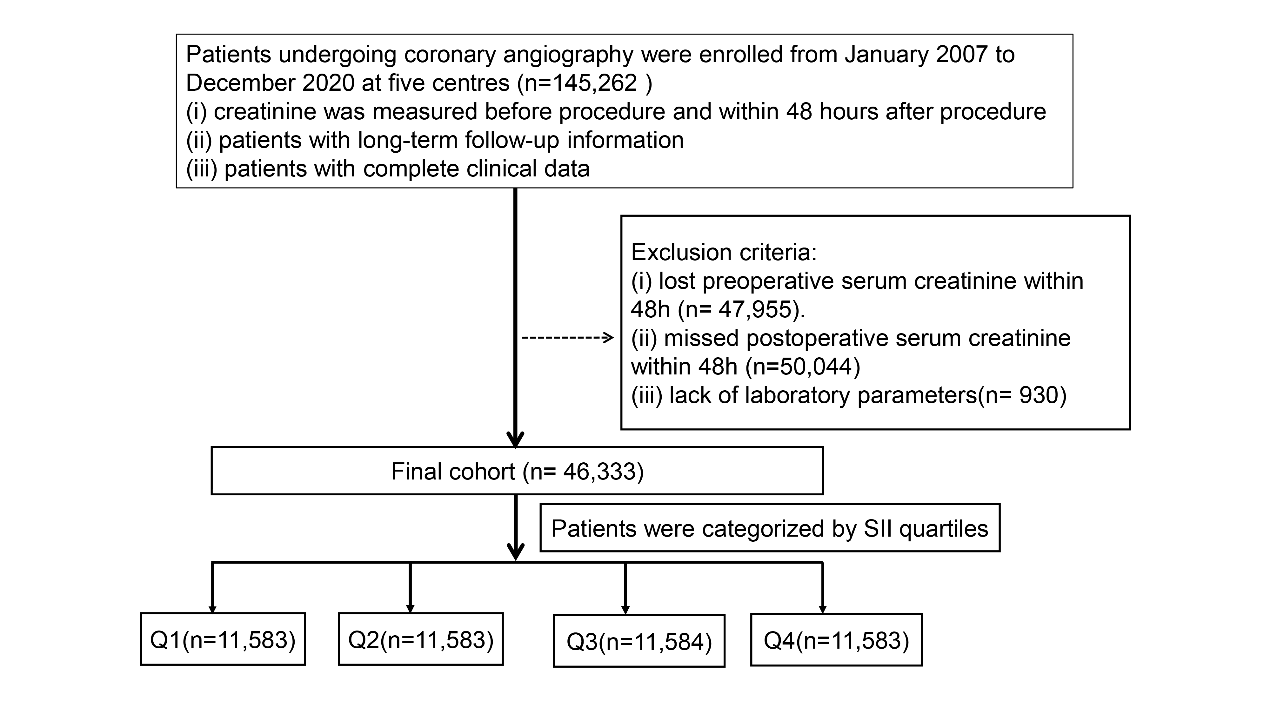


**Supplemental Fig. 2. Subgroup analyses of preprocedural SII on the risk of CA-AKI.** Subgroup analyses were conducted by stratifying different variables including age≥65, gender, PCI, AMI and CHF.


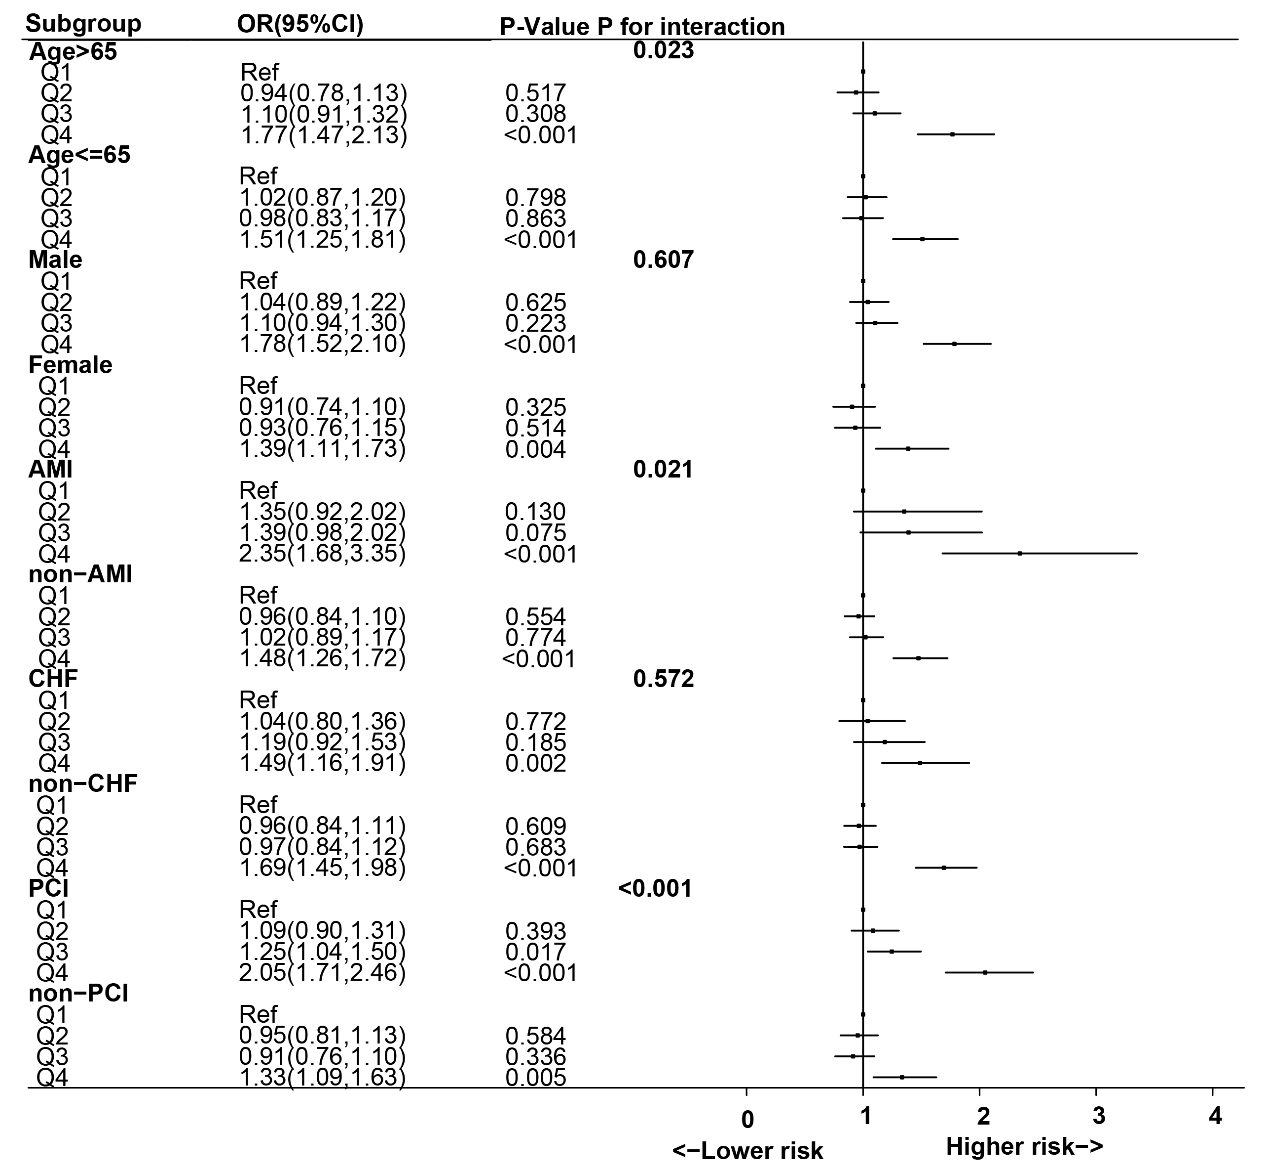

Supplement: Supplementary file 1 [file get_supplementary_file.php]
